# Supplementary material for: The Proximity of Ribosomal Protein Genes to oriC Enhances Vibrio cholerae Fitness in the Absence of Multifork Replication
Source: PubMed Central journal article supplement (PMC5347342; doi:10.1128/mbio.00097-17), 2017-02-28

**Figure S2: Analysis of growth rate of meropolyploids.** The S10 ploidy effect on GR was quantified by averaging obtained  $\mu$  in at least 2 independent experiments, with 4 or more biological replicates, for each mutant strain and normalizing it to the  $\mu$  of the parental strain. Results are expressed as percentage of the variation ( $\mu$  %) with 95% CI with respect to parental strains. Statistical significance was analyzed by one-way ANOVA two-tailed test. Then Dunn test was made for multiple comparisons taking the Parental strains as control. Statistically significant differences are indicated as, \*\*\* meaning  $p < 0.001$  and \*\*\*\* which stands for  $p < 0.0001$ .

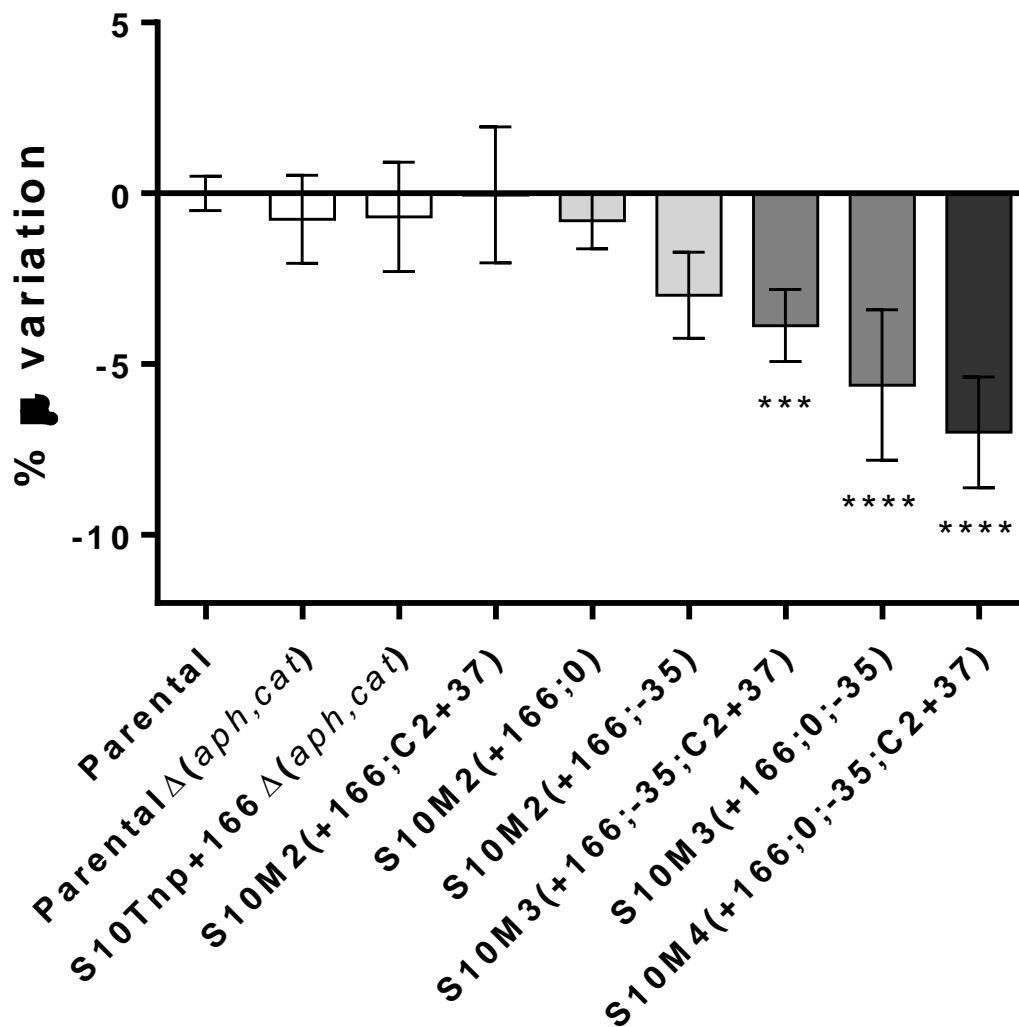

Supplement: mbo001173213sf2.pdf [file mbo001173213sf2.pdf]
