# Supplementary material for: The Proximity of Ribosomal Protein Genes to oriC Enhances Vibrio cholerae Fitness in the Absence of Multifork Replication
Source: PubMed Central journal article supplement (PMC5347342; doi:10.1128/mbio.00097-17), 2017-02-28
Supplement: mbo001173213st1.pdf [file mbo001173213st1.pdf]

**Table S1.** Full list of plasmids, bacteria strains used:

| Name                           | Relevant genotype or features                                                                                                                                                                                                               | Reference                |
|--------------------------------|---------------------------------------------------------------------------------------------------------------------------------------------------------------------------------------------------------------------------------------------|--------------------------|
| <b>Plasmids</b>                |                                                                                                                                                                                                                                             |                          |
| pMP96                          | pSC101 $rep^{TS}$ $oriT_{RP4}$ [ $int_{\lambda}$ - $xis_{\lambda}$ , $int_{HK}$ - $xis_{HK}$ ]                                                                                                                                              | Val et al. 2012          |
| pCP20                          | pSC101 $rep^{TS}$ [ $flp$ ]                                                                                                                                                                                                                 | Cherepanov et al. 1995   |
| pASB11                         | pCR-BluntII-Topo:: lox66-Zeo-lox71                                                                                                                                                                                                          | Soler-Bistué et al. 2015 |
| pJBA28                         | delivery plasmid for mini-Tn5-Km-PA1/04/03-RBSII- $gfpmut3^*$ -T0-T1, Amp <sup>R</sup> and Kan <sup>R</sup>                                                                                                                                 | Andersen JB et al 1998   |
| pASB21                         | pCR-BluntII-Topo:: ( $gfpmut3^*$ $NotI$ fragment-lox66-Zeo <sup>R</sup> -lox71)                                                                                                                                                             | This study               |
| <b><i>Escherichia coli</i></b> |                                                                                                                                                                                                                                             |                          |
| DH5 $\alpha$                   | F $endA1$ $glnV44$ $thi-1$ $recA1$ $relA1$ $gyrA96$ $deoR$ $nupG$ $\Phi80\Delta lacZ\Delta M15 \Delta(lacZYA-argF)U169$ , $hsdR17(\tau_K^- m_K^+)$ , $\lambda^-$                                                                            |                          |
| <b><i>Vibrio cholerae</i></b>  |                                                                                                                                                                                                                                             |                          |
| N16961 $ChapR\Delta lacZ$      | N16961::mTn7 $hapR^+$ $\Delta lacZ$ using pMEV69                                                                                                                                                                                            | Val et al. 2012          |
| Parental -1120                 | PGB-A192:: $attB^?$ -lox66- $dfrB1$ -lox71 inserted in the intergenic region between VC1508-VC1509.                                                                                                                                         | Soler-Bistué et al. 2015 |
| Parental C2+479                | PGB-A192:: $attB^?$ -lox66- $dfrB1$ -lox71 inserted in the intergenic region between VCA0543-VCA0544.                                                                                                                                       | Soler-Bistué et al. 2015 |
| PGB-B393                       | N16961 $\Delta lacZ$ , [ $lox2272-ere(A)$ -lox2272] (at the intergenic space VC2569-VC2570), [ $lox66-zeo^R$ -lox71] (at the intergenic space VC2599-VC2600) flanking the region VC2569 and VC2599 encompassing $S10$ - $spc-\alpha$ locus. | Soler-Bistué et al. 2015 |
| S10Tnp+166                     | S10 relocated closer to $oriC1$ in the intergenic region between VC2739-VC2740.                                                                                                                                                             | Soler-Bistué et al. 2015 |
| S10Tnp-35                      | S10 relocated next to its original location in the intergenic region between VC2536-VC2537.                                                                                                                                                 | Soler-Bistué et al. 2015 |

|                                    |                                                                                                                                                                                                                                                                               |                          |
|------------------------------------|-------------------------------------------------------------------------------------------------------------------------------------------------------------------------------------------------------------------------------------------------------------------------------|--------------------------|
| S10Tnp-510                         | S10 relocated at the middle of the left replicore of chromosome 1 in the intergenic region between VC2075-VC2076.                                                                                                                                                             | Soler-Bistué et al. 2015 |
| S10Tnp-1120                        | S10 relocated near the <i>dif</i> region of chromosome 1 in the intergenic region VC1508-VC1509.                                                                                                                                                                              | Soler-Bistué et al. 2015 |
| S10TnpC2+37                        | S10 relocated near the <i>oriC2</i> in the intergenic region between VCA0030-VCA0031.                                                                                                                                                                                         | Soler-Bistué et al. 2015 |
| S10TnpC2+479                       | S10 relocated near the <i>dif</i> sequence of chromosome 2 in the intergenic region between VCA0543-VCA0544.                                                                                                                                                                  | Soler-Bistué et al. 2015 |
| PGB-B393                           | N16961 $\Delta lacZ$ , [lox2272- <i>ere(A)</i> -lox2272] (at the intergenic space VC2569-VC2570), [lox66- <i>zeo<sup>R</sup></i> -lox71] (at the intergenic space VC2599-VC2600) flanking the region VC2569 and VC2599 encompassing <i>S10-spc-<math>\alpha</math></i> locus. | Soler-Bistué et al. 2015 |
| S10Md(-510;-1120)                  | Merodiploid bearing <i>S10-spc-<math>\alpha</math></i> copies at the intergenic sequences of VC2075-VC2076 and VC1508-VC1509.                                                                                                                                                 | Soler-Bistué et al. 2015 |
| S10Md(-1120;C2+479)                | Merodiploid bearing <i>S10-spc-<math>\alpha</math></i> copies at the intergenic sequences of VC1508-VC1509 and VCA0543-VCA0544.                                                                                                                                               | Soler-Bistué et al. 2015 |
| Parental +166<br>$\Delta(aph,cat)$ | PGB-A192:: <i>attB</i> <sup>3</sup> -lox66- <i>dfrB1</i> -lox71 $\Delta(aph,cat)$ inserted in the intergenic region between VC2739-VC2740. Kanamycin and chloramphenicol resistance cassettes were deleted using a flipase expressing plasmid.                                | This study               |
| S10Tnp+166<br>$\Delta(aph,cat)$    | S10 relocated closer to <i>oriC1</i> . Derived from Parental+166 $\Delta(aph,cat)$ .                                                                                                                                                                                          | This study               |
| S10Tnp-35 $\Delta(aph)$            | S10Tnp-35 kanamycin resistance cassettes were deleted using a flipase expressing plasmid.                                                                                                                                                                                     | This study               |
| S10TnpC2+37 $\Delta(cat)$          | S10TnpC2+37 chloramphenicol resistance cassettes were deleted using a flipase expressing plasmid.                                                                                                                                                                             | This study               |
| S10M2(+166;0)                      | Merodiploid bearing 2 <i>S10-spc-<math>\alpha</math></i> copies at the intergenic regions between of VC2739-VC2740 and at its original location.                                                                                                                              | This study               |
| S10M2(+166;-35)                    | Merodiploid bearing 2 <i>S10-spc-<math>\alpha</math></i> copies at the intergenic regions between of VC2739-VC2740 and VC2536-VC2537.                                                                                                                                         | This study               |

|                                       |                                                                                                                                                                                                                                   |            |
|---------------------------------------|-----------------------------------------------------------------------------------------------------------------------------------------------------------------------------------------------------------------------------------|------------|
| S10M2(+166;C2+37)                     | Merodiploid bearing 2 <i>S10-spc-α</i> copies at the intergenic regions between of VC2739-VC2740 and VCA0030-VCA0031.                                                                                                             | This study |
| S10M3(+166;0;C2+37)                   | Merotriploid bearing 3 <i>S10-spc-α</i> copies at wild type location plus two copies at the intergenic sequences between ORFs VC2739-VC2740 and VCA0030-VCA0031.                                                                  | This study |
| S10M3(+166;0;-35)                     | Merotriploid bearing 3 <i>S10-spc-α</i> copies at wild type location plus two copies at the intergenic sequences between ORFs VC2739-VC2740 and VC2536-VC2537.                                                                    | This study |
| S10M4(+166;0;-35;C2+37)               | Merotetraploid bearing 4 <i>S10-spc-α</i> copies, one at wild type location and 3 others at the intergenic sequences between VC2739-VC2740, VC2536-VC2537 and VCA0030-VCA0031.                                                    | This study |
| <i>V.cholerae</i> :: <i>gfpmut3</i> * | NotI fragment from pJBA28 (Andersen et al. (1998)) containing promoter P <sub>A1/04/3</sub> , RBSII and <i>gfpmut3</i> * linked to Zeo <sup>R</sup> from pASB21 gene was inserted in the intergenic region between VC0696-VC0697. | This study |
| Parental-1120:: <i>gfpmut3</i> *      | <i>gfpmut3</i> *-ZeoR cassette was inserted in the intergenic region between VC0696-VC0697 in Parental-1120 strain.                                                                                                               | This study |
