# Supplementary material for: The Proximity of Ribosomal Protein Genes to oriC Enhances Vibrio cholerae Fitness in the Absence of Multifork Replication
Source: PubMed Central journal article supplement (PMC5347342; doi:10.1128/mbio.00097-17), 2017-02-28
Supplement: mbo001173213st2.pdf [file mbo001173213st2.pdf]

1 **Table S2:** Proportions between key genomic loci calculated from the MFA data.

|                  | Parental<br>Fast<br>growing<br>conditions | Slow growing conditions |      |      |       |        |                |
|------------------|-------------------------------------------|-------------------------|------|------|-------|--------|----------------|
|                  |                                           | Parental                | -35  | -510 | -1120 | C2+479 | (-1120;C2+479) |
| <i>ori1/ter1</i> | 3.51                                      | 1.74                    | 1.79 | 1.94 | 1.73  | 1.81   | 1.84           |
| <i>ori2/ter2</i> | 1.69                                      | 1.27                    | 1.29 | 1.28 | 1.31  | 1.55   | 1.31           |
| <i>ori1/ori2</i> | 2.16                                      | 1.33                    | 1.35 | 1.49 | 1.33  | 1.32   | 1.47           |
| <i>S10/ter1</i>  | 2.63                                      | 1.56                    | 1.57 | 1.58 | 1.03  | 1.06   | 2.15           |
| <i>ori1/S10</i>  | 1.33                                      | 1.12                    | 1.14 | 1.23 | 1.68  | 1.71   | 0.86           |

2

3
